# Supplementary material
Source: publisher figshare collection journal article supplement (https://acs.figshare.com/ndownloader/files/4096933)
Supplement: Supplementary file 1 [file 4096933]

**Unilateral Access Regulation: Ground State Dynamics of the  
*Pseudomonas aeruginosa* Outer Membrane Efflux Duct OprM**

**SUPPLEMENTAL MATERIAL**

Dennis C. Koch, Martin Raunest, Tim Harder<sup>#</sup>, Christian Kandt<sup>\*</sup>

Computational Structural Biology, Department of Life Science Informatics B-IT, Life & Medical  
Sciences Center, University of Bonn, Dahlmannstr. 2, 53113 Bonn, Germany

<sup>#</sup> : current address

Zentrum für Bioinformatik, University of Hamburg, Bundesstraße 43, 20146 Hamburg, Germany

Running title: OprM Gating

<sup>\*</sup> : corresponding author.

Email: [kandt@bit.uni-bonn.de](mailto:kandt@bit.uni-bonn.de); Phone: #49 228 2699 324; Fax: #49 228 2699 341

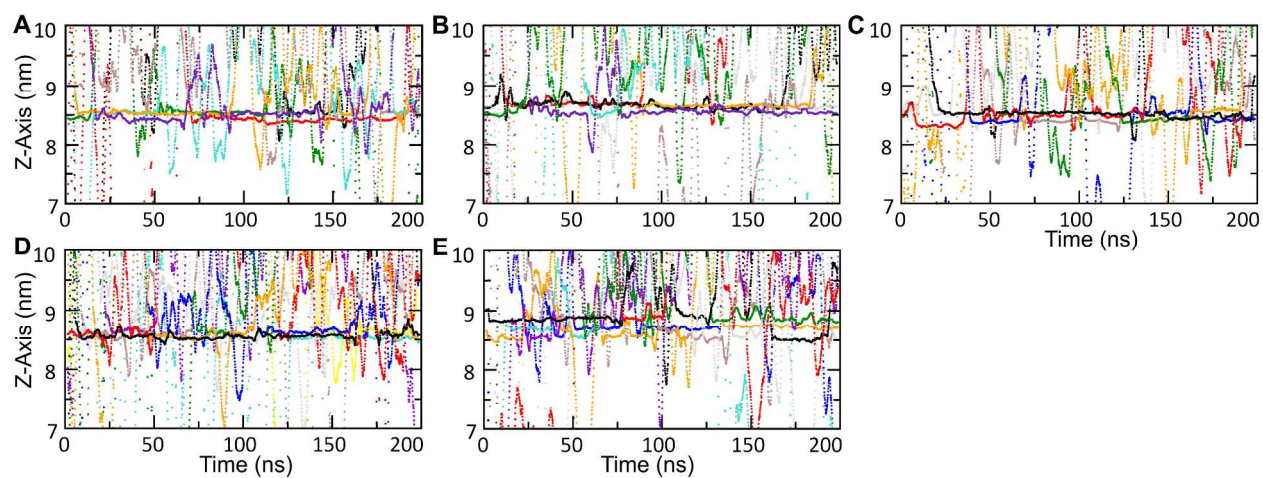

**Supplemental figure 1:** Z trajectories of the sodium ions occupying the observed Asp171/Asp230  $\text{Na}^+$  binding sites in each OprM monomer. Once initial sodium binding has occurred during the first 40 ns, in all five independent runs (A-E) the binding sites remain occupied for the rest of the simulation time albeit individual sodium ions do exchange. Vertical gaps between the sodium traces in (E) are due to a slightly tilted orientation OprM adopts in this simulation.
